# Supplementary material for: On the not so anomalous water-induced structural transformations of choline chloride–urea (reline) deep eutectic system
Source: Royal Society of Chemistry journal article supplement (doi:10.1039/d2cp04139a), 2022-11-22
Supplement: d2cp04139a1.pdf [file d2cp04139a1.pdf]

# **On the Not So Anomalous Water-induced Structural Transformation of Choline Chloride-Urea (Reline) Deep Eutectic System**

## ***SUPPORTING INFORMATION***

Hugo Monteiro<sup>a</sup>, Alexandre Paiva<sup>a</sup>, Ana Rita C. Duarte<sup>a</sup>, Nuno Galamba<sup>b,\*</sup>

<sup>a</sup> School of Science and Technology, Universidade NOVA de Lisboa, 2829-516 Caparica, Portugal

<sup>b</sup> Biosystems and Integrative Sciences Institute, Faculty of Sciences of the University of Lisbon, C8, Campo Grande, 1749-016 Lisbon, Portugal.

---

\* Corresponding author: [njgalamba@fc.ul.pt](mailto:njgalamba@fc.ul.pt)

**Table S1** – Urea parameters in the OPLS-DA and OPLS-DA/Urea (in brackets) force fields.

| Atom | $\epsilon$ (kJmol <sup>-1</sup> ) | $\sigma$ (nm) | $q$ ( $e$ )     |
|------|-----------------------------------|---------------|-----------------|
| C    | 0.65898 (0.43932)                 | 0.375 (0.375) | +0.124 (+0.142) |
| O    | 1.31796 (0.87864)                 | 0.296 (0.296) | -0.322 (-0.390) |
| N    | 1.06692 (0.71128)                 | 0.355 (0.325) | -0.453 (-0.542) |
| H    | -                                 | -             | +0.276 (+0.333) |

**Table S2** – MD GAFF0.8-PPC diffusion and shear viscosity coefficients of ChCl:U:W(1:2: $\zeta$ ) at 298 K and 0.1 MPa.

| $\zeta$ | $D_{\text{Chol}}$<br>(10 <sup>-8</sup> cm <sup>2</sup> s <sup>-1</sup> ) | $D_{\text{Cl}}$<br>(10 <sup>-8</sup> cm <sup>2</sup> s <sup>-1</sup> ) | $D_{\text{Urea}}$<br>(10 <sup>-8</sup> cm <sup>2</sup> s <sup>-1</sup> ) | $D_{\text{Water}}^{\text{a}}$<br>(10 <sup>-8</sup> cm <sup>2</sup> s <sup>-1</sup> ) | $\eta^{\text{b}}$<br>(mPa·s) |
|---------|--------------------------------------------------------------------------|------------------------------------------------------------------------|--------------------------------------------------------------------------|--------------------------------------------------------------------------------------|------------------------------|
| 1       | 0.011                                                                    | 0.018                                                                  | 0.019                                                                    | 0.076                                                                                | 99.3 ± 0.9                   |
| 2       | 0.034                                                                    | 0.062                                                                  | 0.053                                                                    | 0.166                                                                                | 28.6 ± 0.3                   |
| 5       | 0.135(5)                                                                 | 0.245                                                                  | 0.193                                                                    | 0.511                                                                                | 7.16 ± 0.02                  |
| 10      | 0.320                                                                    | 0.564                                                                  | 0.422                                                                    | 0.938                                                                                | 2.89 ± 0.004                 |
| 15      | 0.431                                                                    | 0.808                                                                  | 0.617                                                                    | 1.233                                                                                | 2.02 ± 0.009                 |
| 20      | 0.542                                                                    | 0.995                                                                  | 0.737                                                                    |                                                                                      | 1.62 ± 0.02                  |
| 30      | 0.679                                                                    | 1.210                                                                  | 0.928                                                                    | 1.738                                                                                | 1.22 ± 0.01                  |
| 40      | 0.767                                                                    | 1.397                                                                  | 1.047                                                                    | 1.930                                                                                | 1.07 ± 0.002                 |

<sup>a</sup> The diffusion coefficient of TIP4P/2005 water is<sup>1</sup>  $2.1 \times 10^{-8} \text{ cm}^2\text{s}^{-1} \pm 0.01 \times 10^{-8} \text{ cm}^2\text{s}^{-1}$ ; the experimental<sup>2</sup> self-diffusion coefficient of water at 298 K and 0.1 MPa is  $2.3 \times 10^{-5} \text{ cm}^2\text{s}^{-1}$ .

<sup>b</sup> The viscosity of TIP4P/2005 water is<sup>1</sup>  $0.88 \pm 0.05 \text{ mPa}\cdot\text{s}$ ; the experimental viscosity of water at 298 K and 0.1 MPa is<sup>78</sup>  $0.89 \text{ mPa}\cdot\text{s}$ .

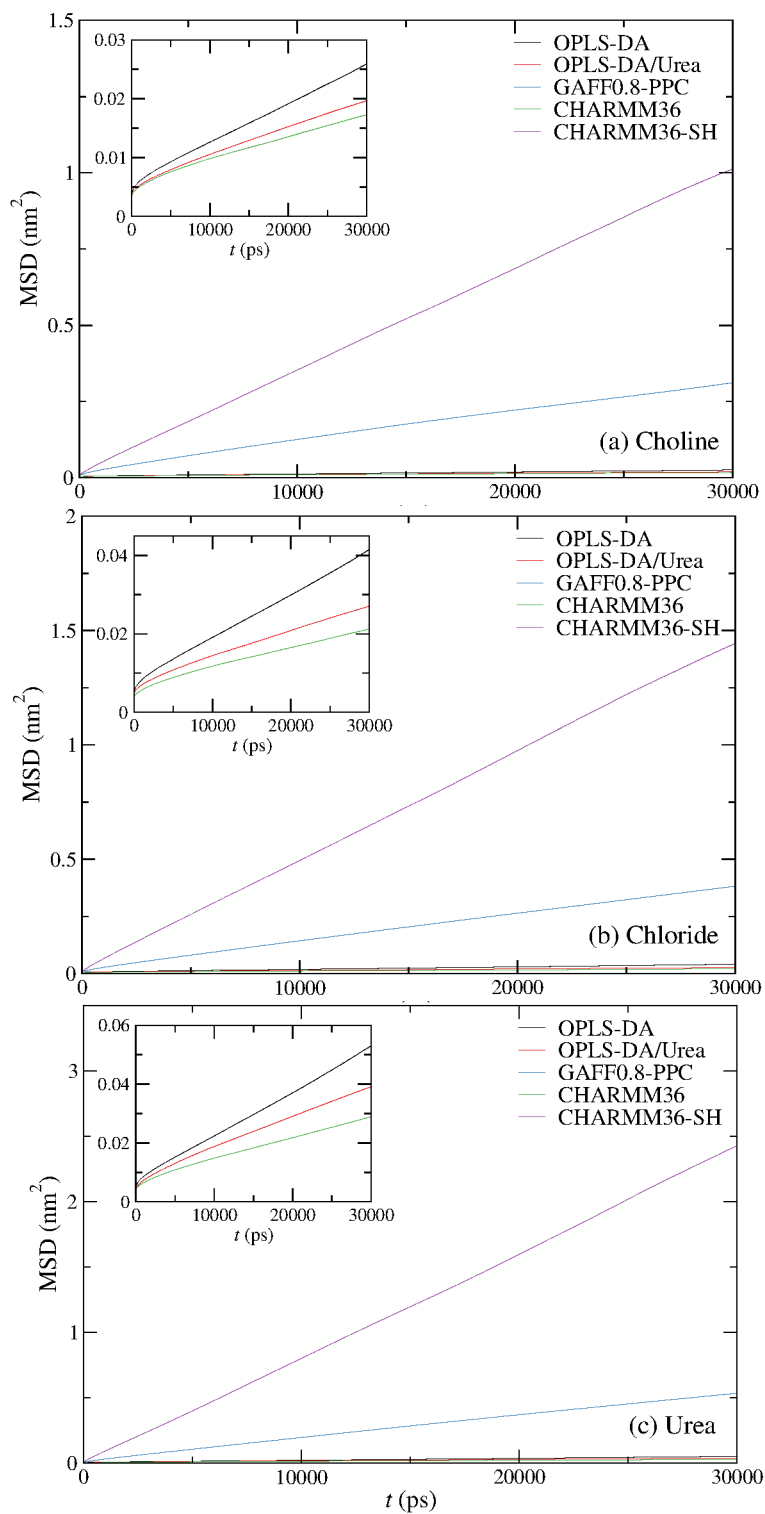

**Figure S1** – Mean square displacement for the DES components calculated for the different force fields.

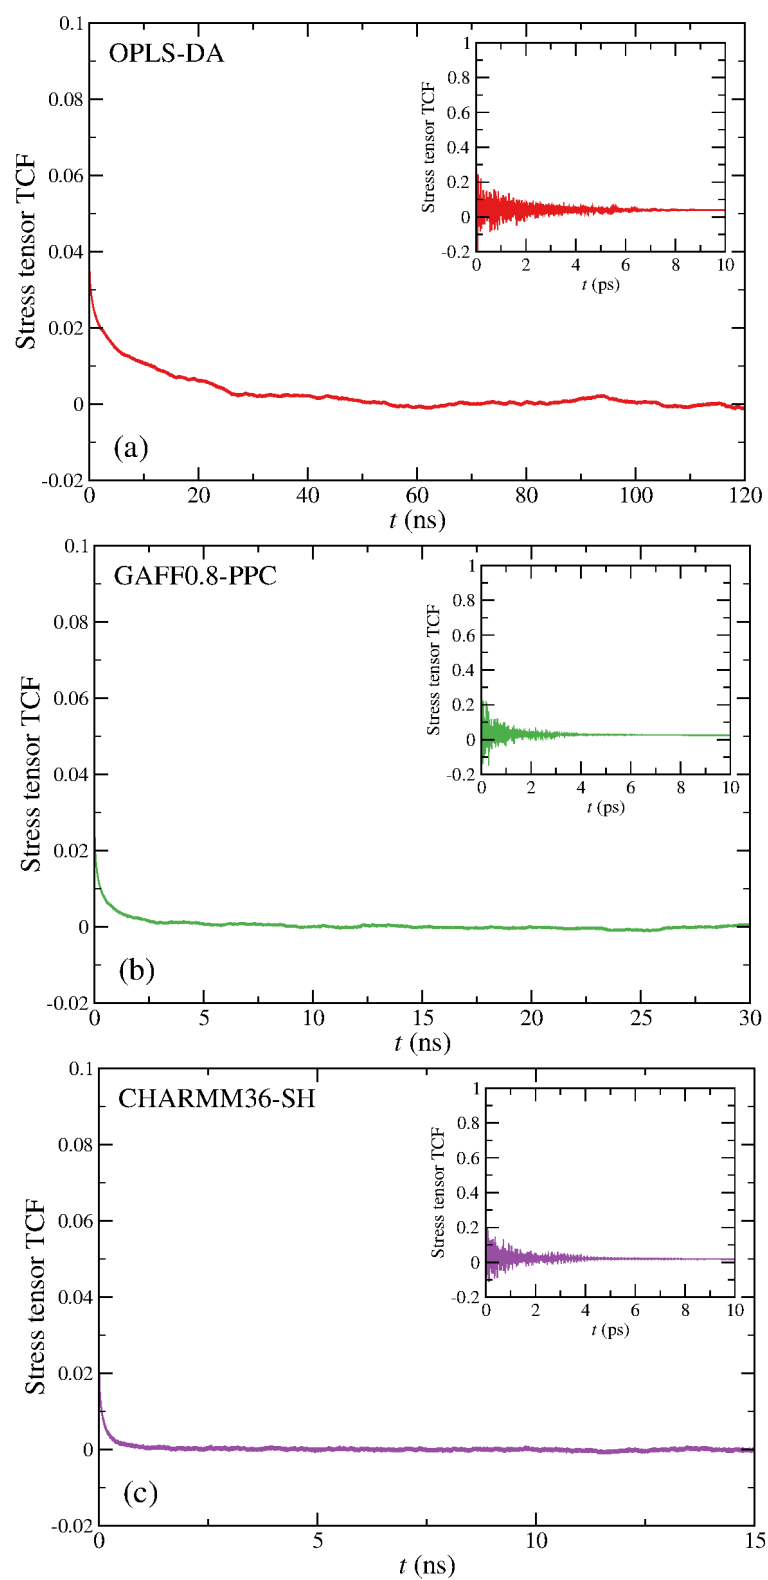

**Figure S2** – Normalized stress tensor tcfs for the (a) OPLS-DA, (b) GAFF0.8-PPC, and (c) CHARMM36-SH force fields. The y-scale of the main plots is truncated at 0.1 ps. The inset plots show the fluctuations observed during the first 10 ps.

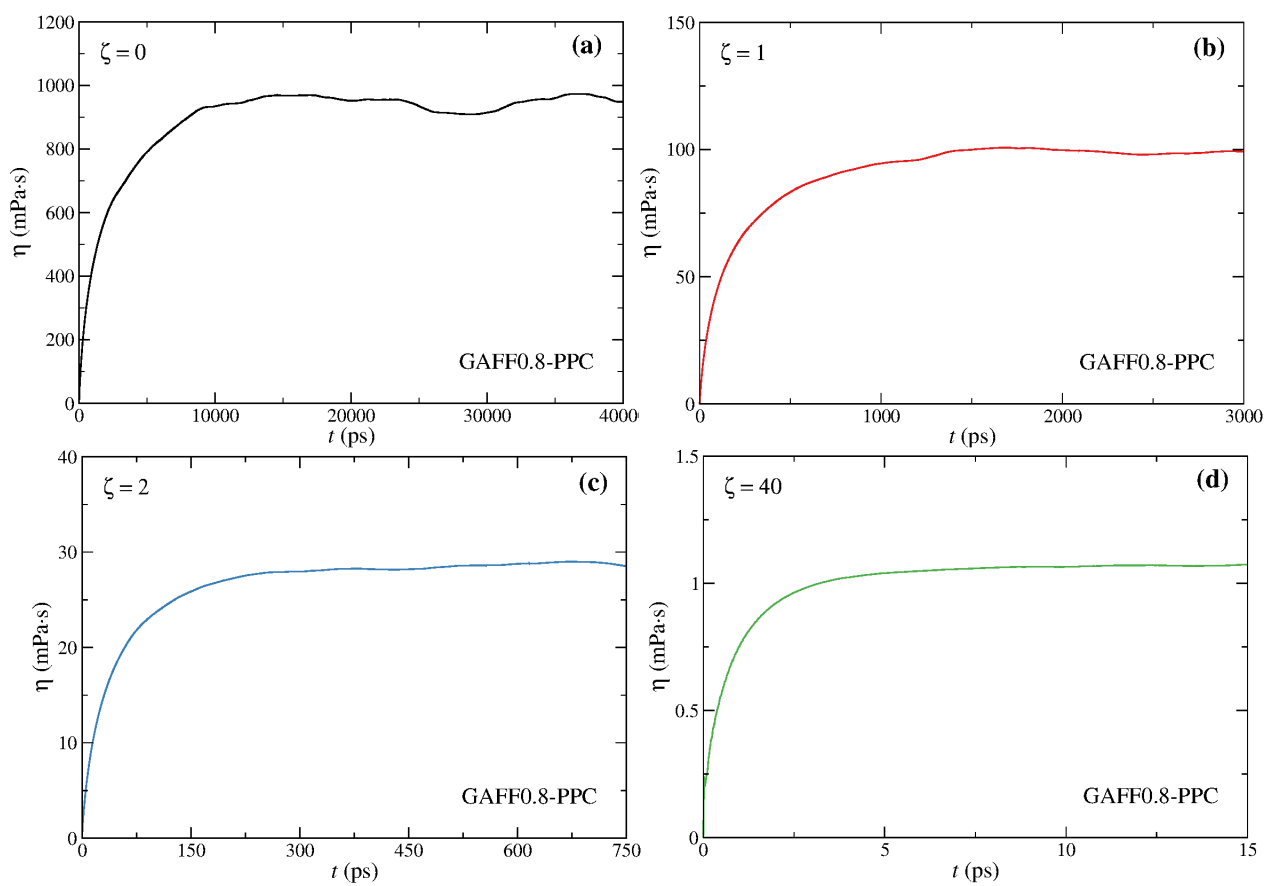

**Figure S3** – Cumulative viscosity of GAFF0.8-PPC reline as obtained from eq. (2), at different water ratios,  $\zeta$ .

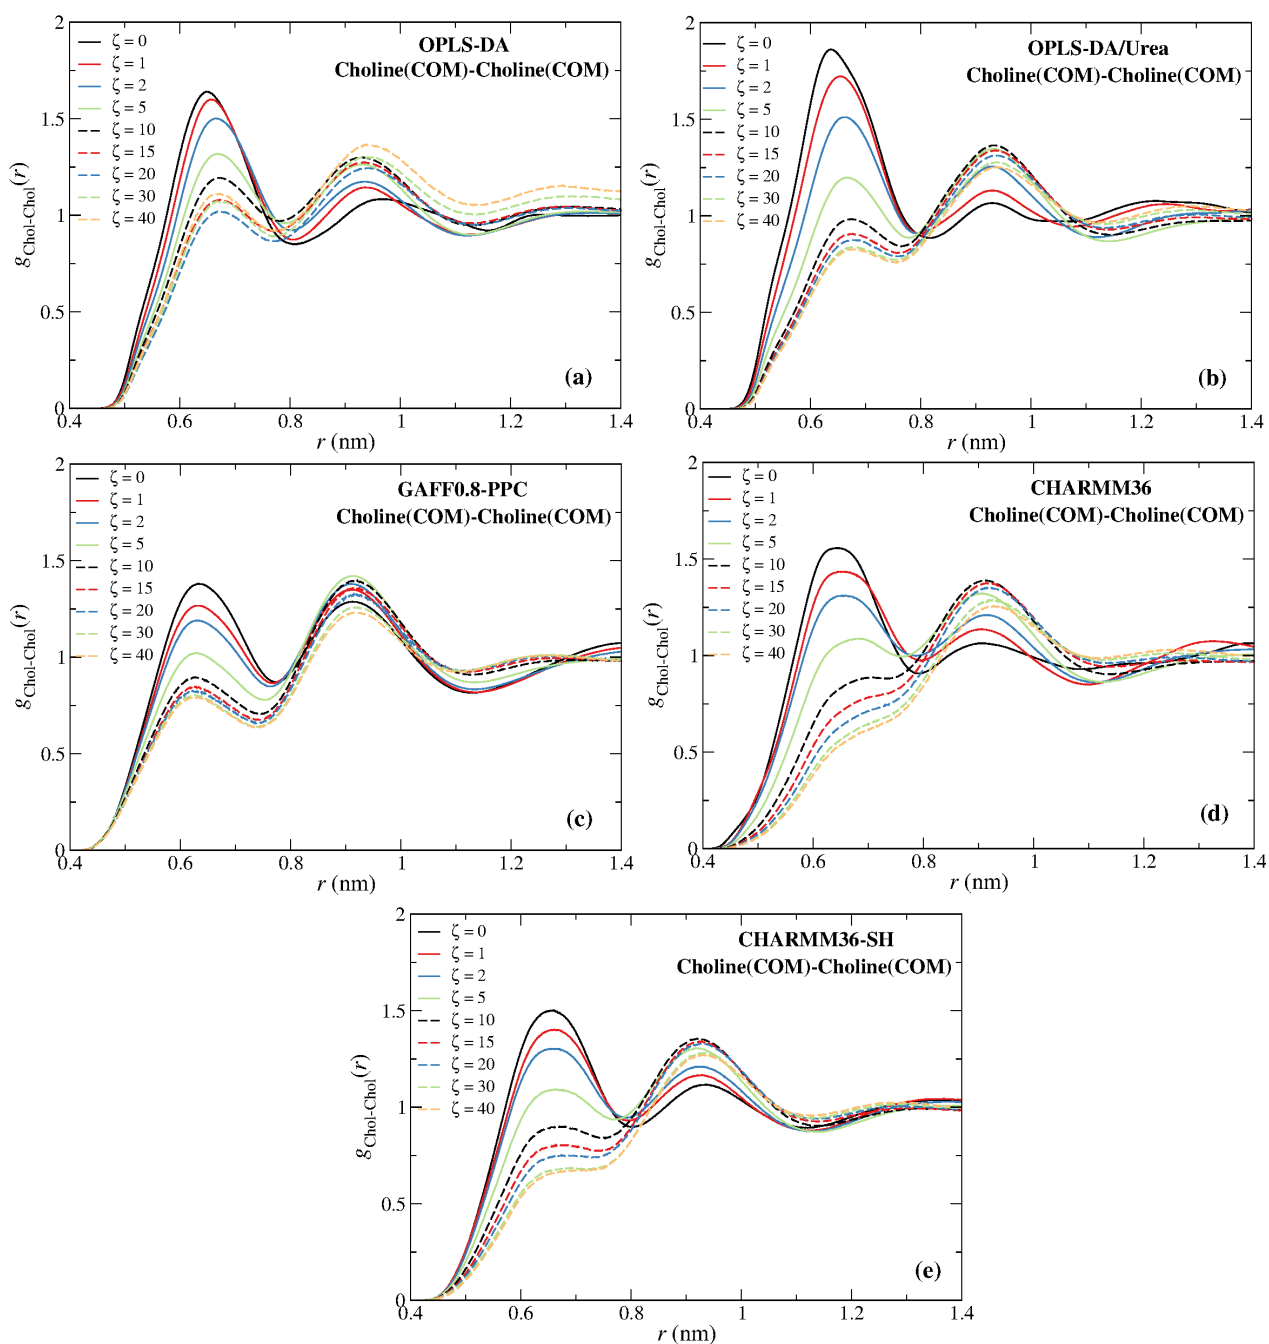

**Figure S4** – Choline-Choline rdf's for the different force fields and water contents. The COM of choline was used to calculate the rdf's.

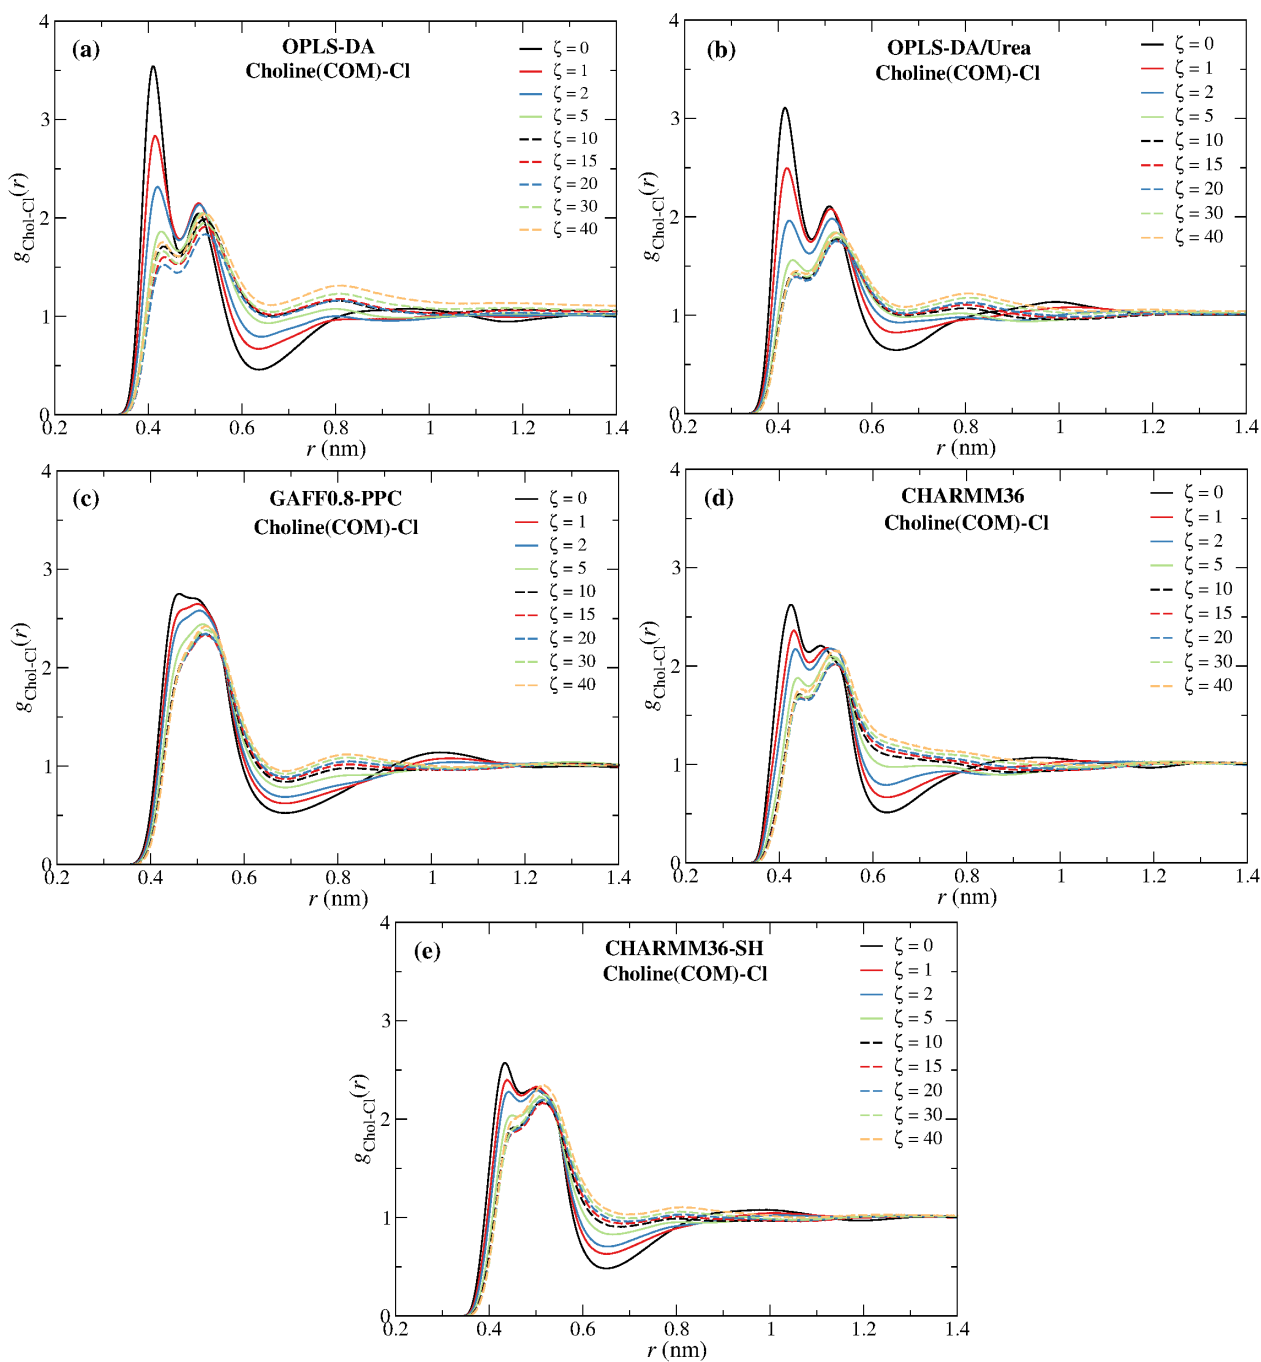

**Figure S5** – Choline-Chloride rdfs for the different force fields and water contents. The COM of choline was used to calculate the rdfs.

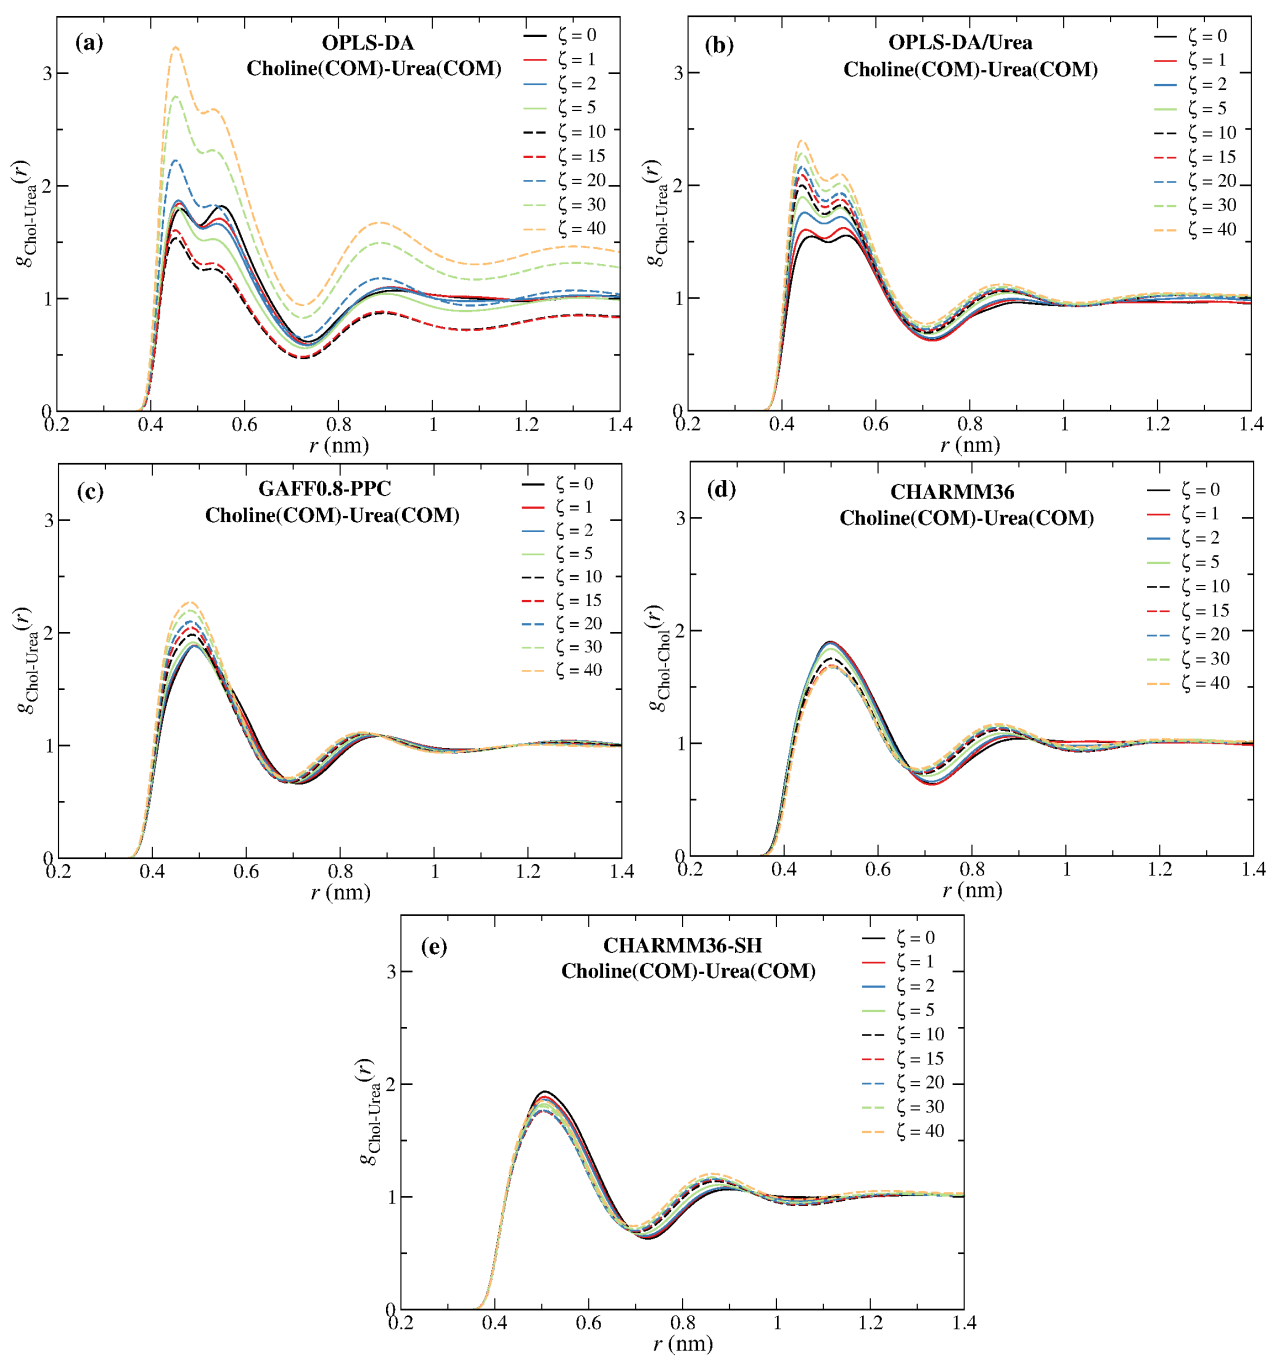

**Figure S6** – Choline-Urea rdfs for the different force fields and water contents. The COM of choline and urea were used to calculate the rdfs.



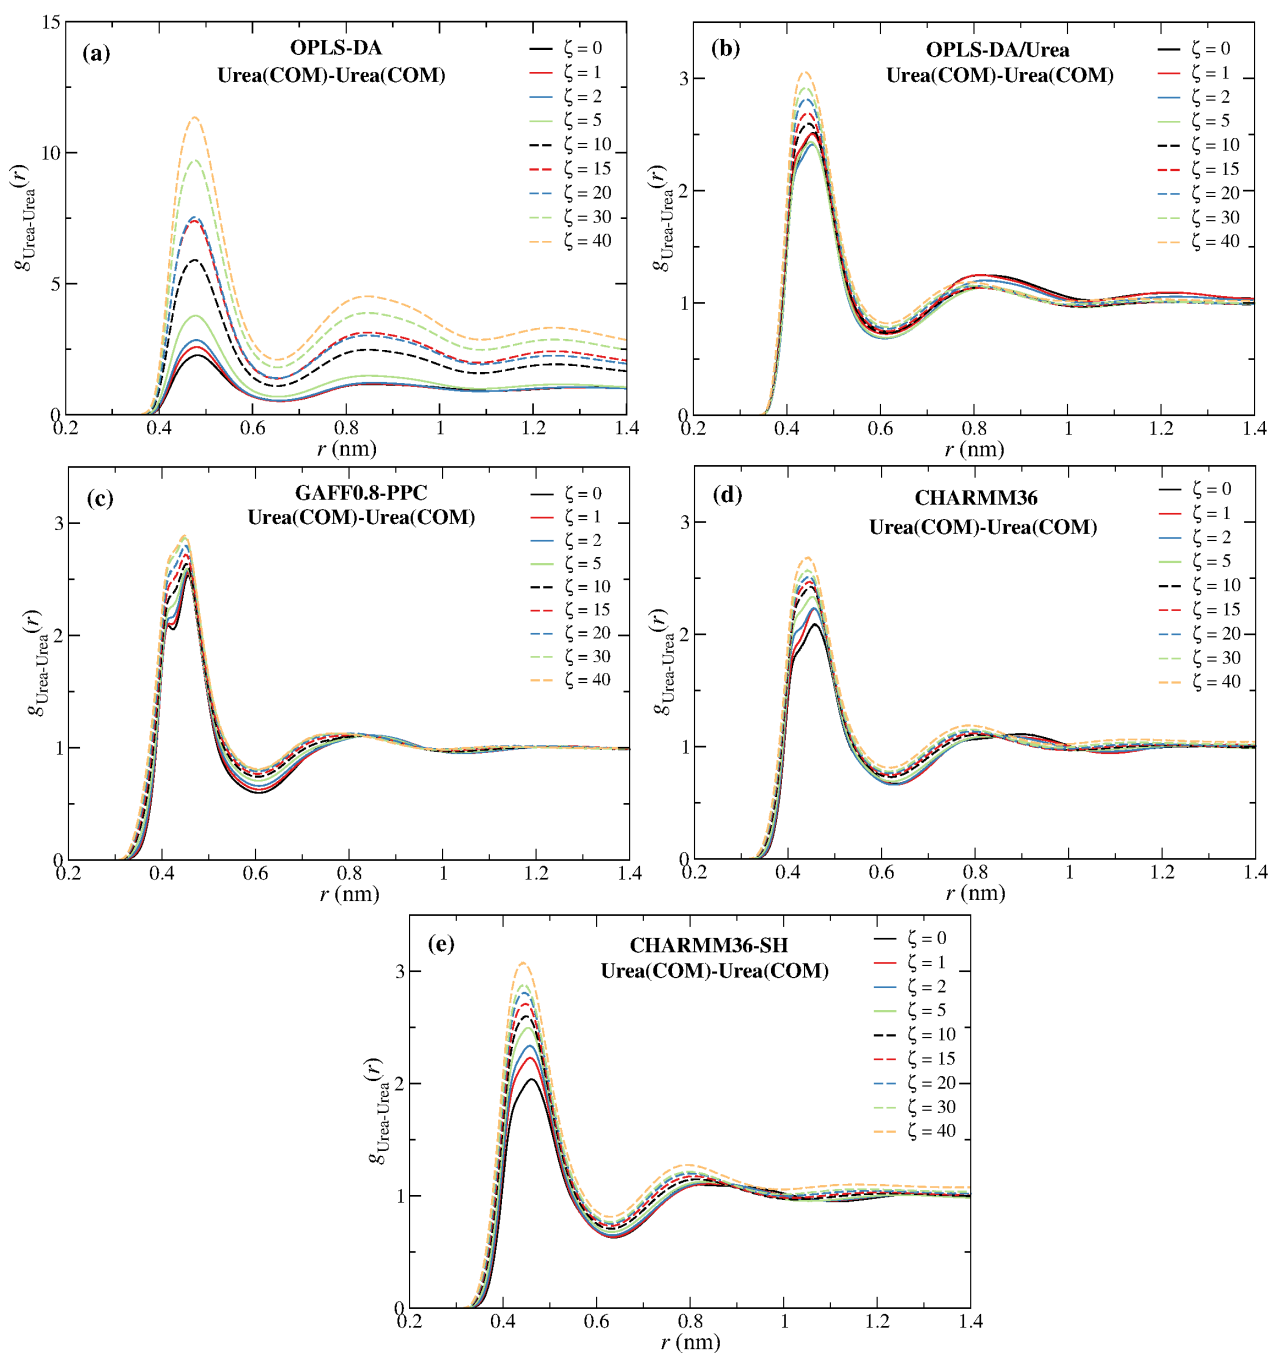

**Figure S7** – Urea-Urea rdfs for the different force fields and water contents. The COM of urea was used to calculate the rdfs. Notice the different scale of the rdf for the OPLS-DA force field. This is associated with the aggregation of urea observed with this force field.

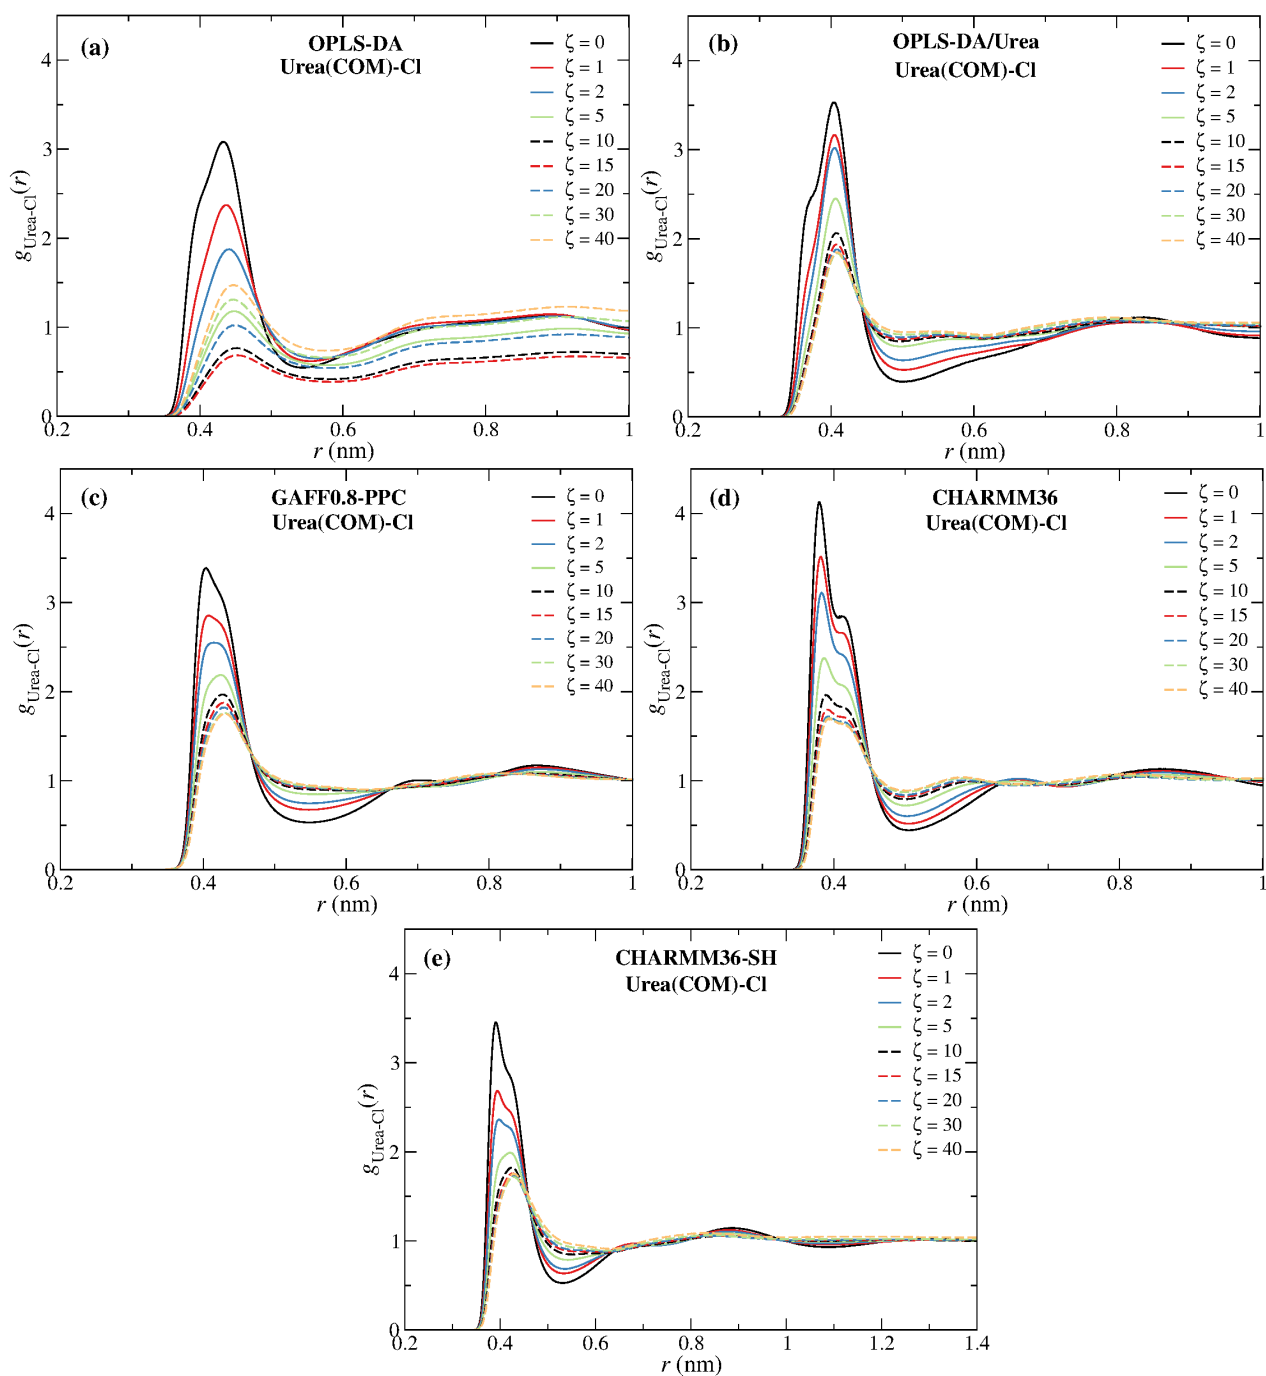

**Figure S8** – Urea-Chloride rdfs for the different force fields and water contents. The COM of urea was used to calculate the rdfs.

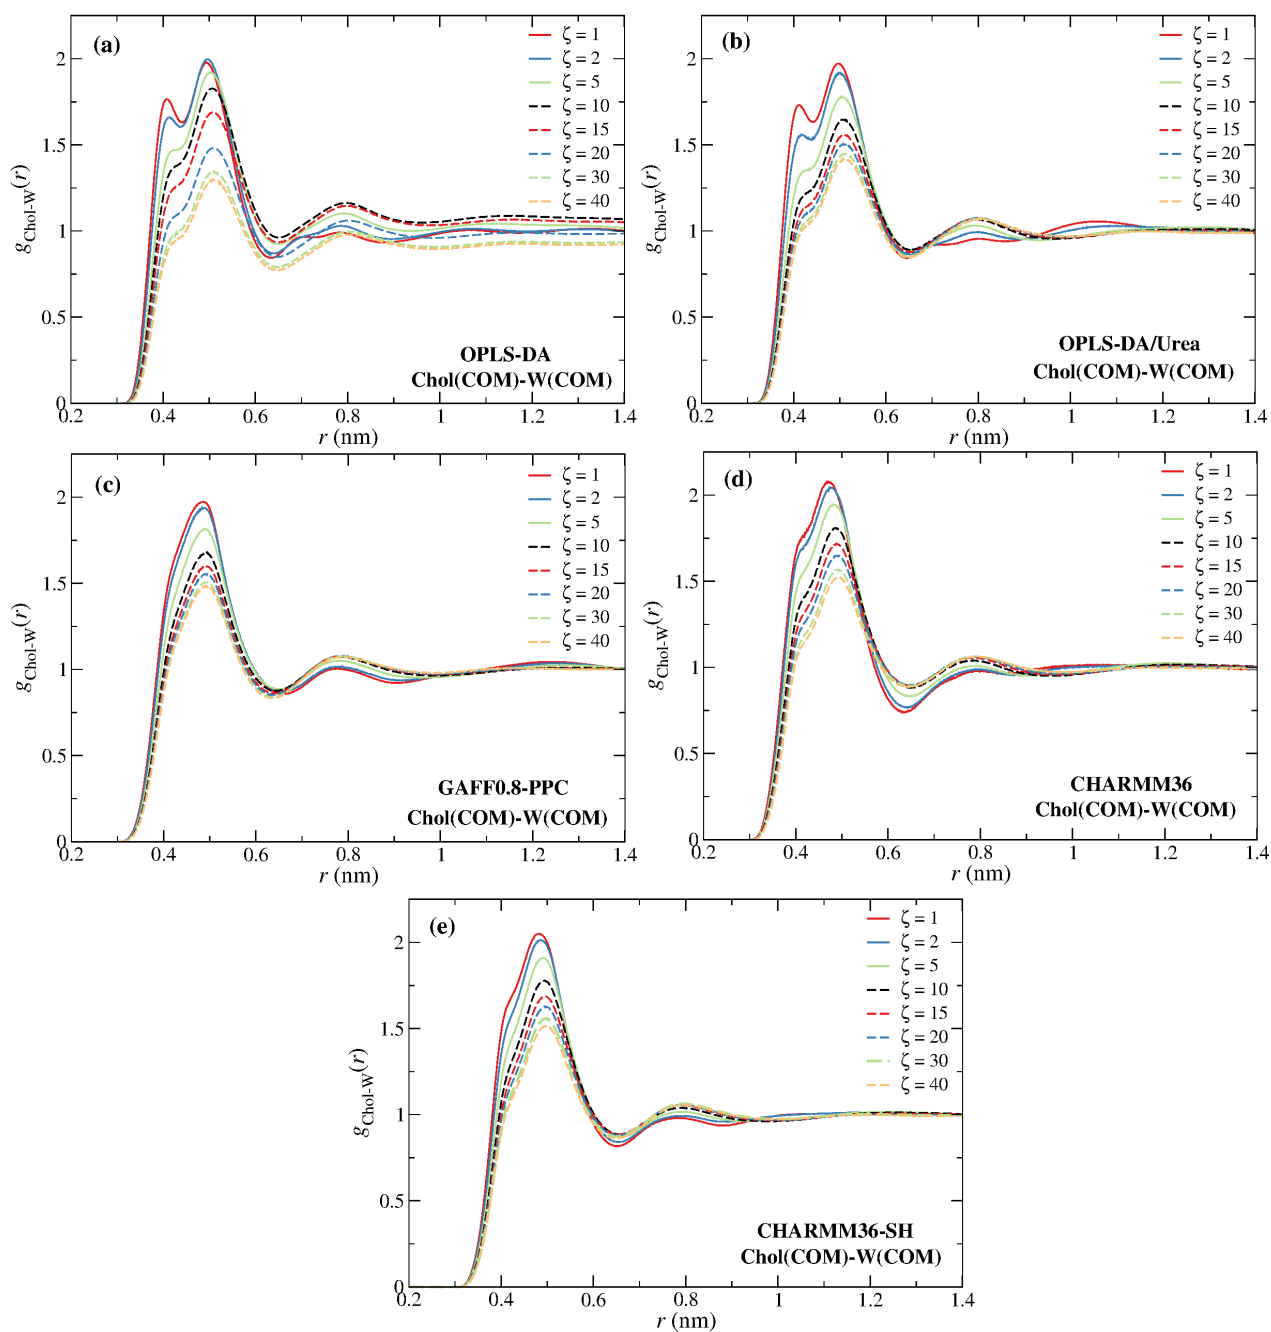

**Figure S9** – Choline-Water rdfs for the different force fields and water contents. The COM of choline and water were used to calculate the rdfs.

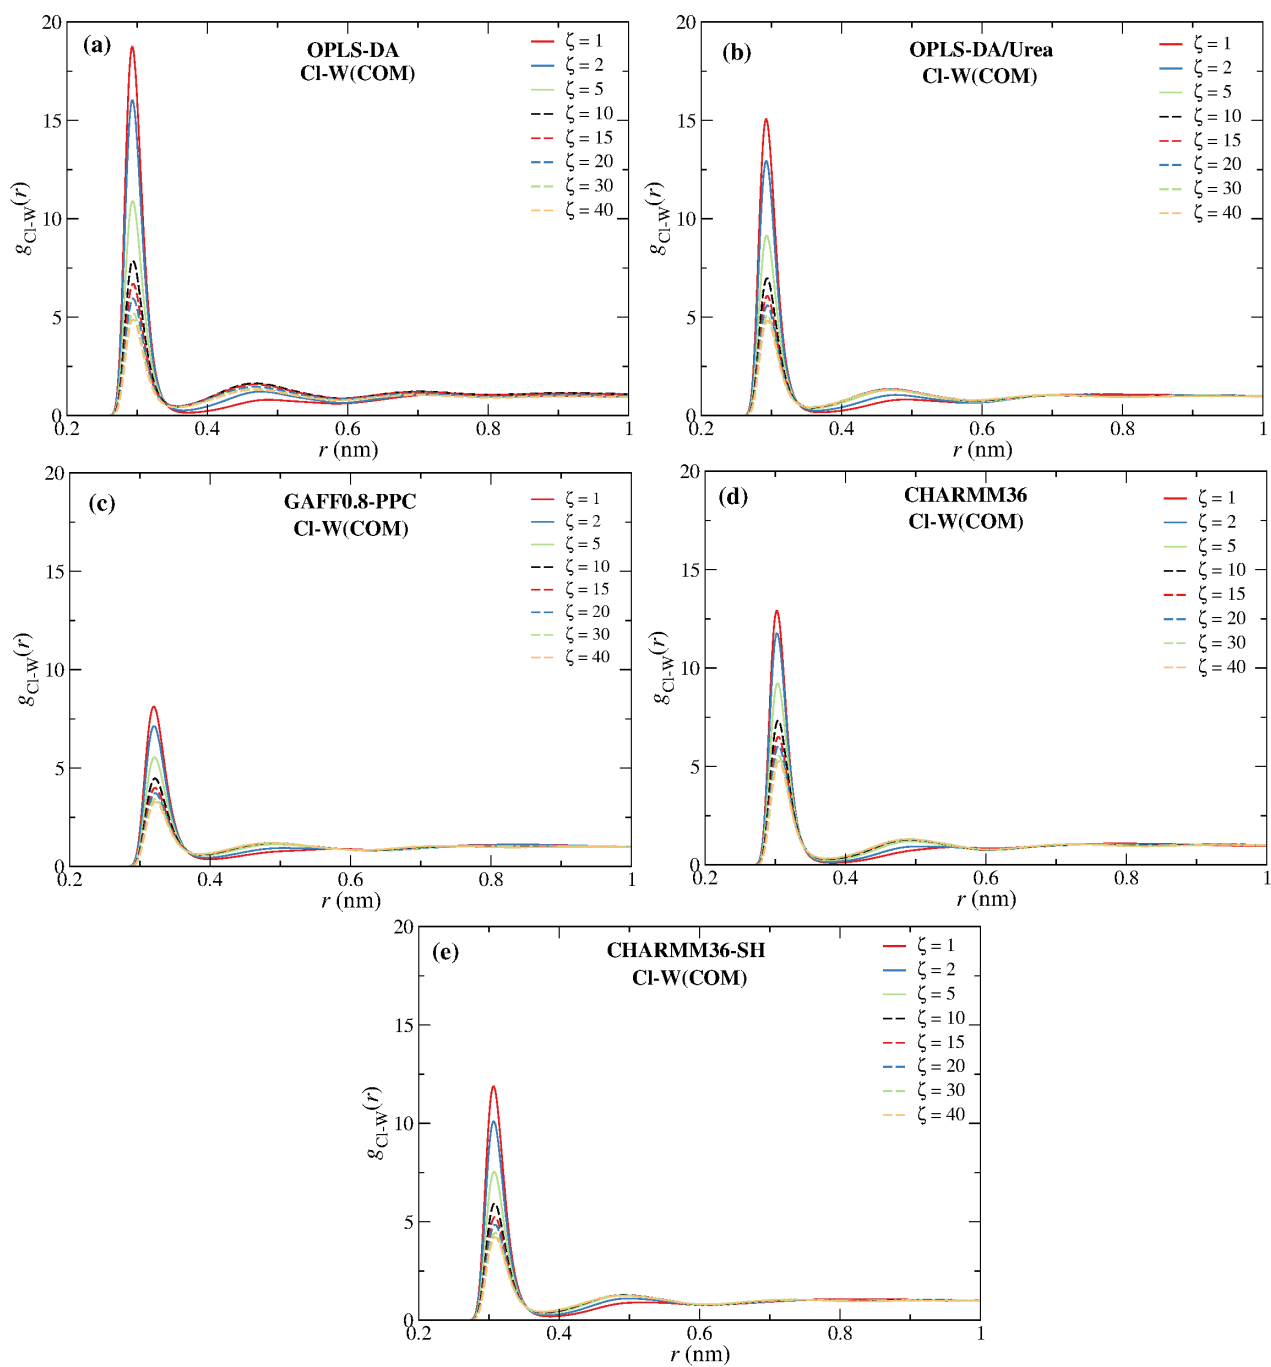

**Figure S10** – Chloride-Water rdfs for the different force fields and water contents. The COM of water was used to calculate the rdfs.

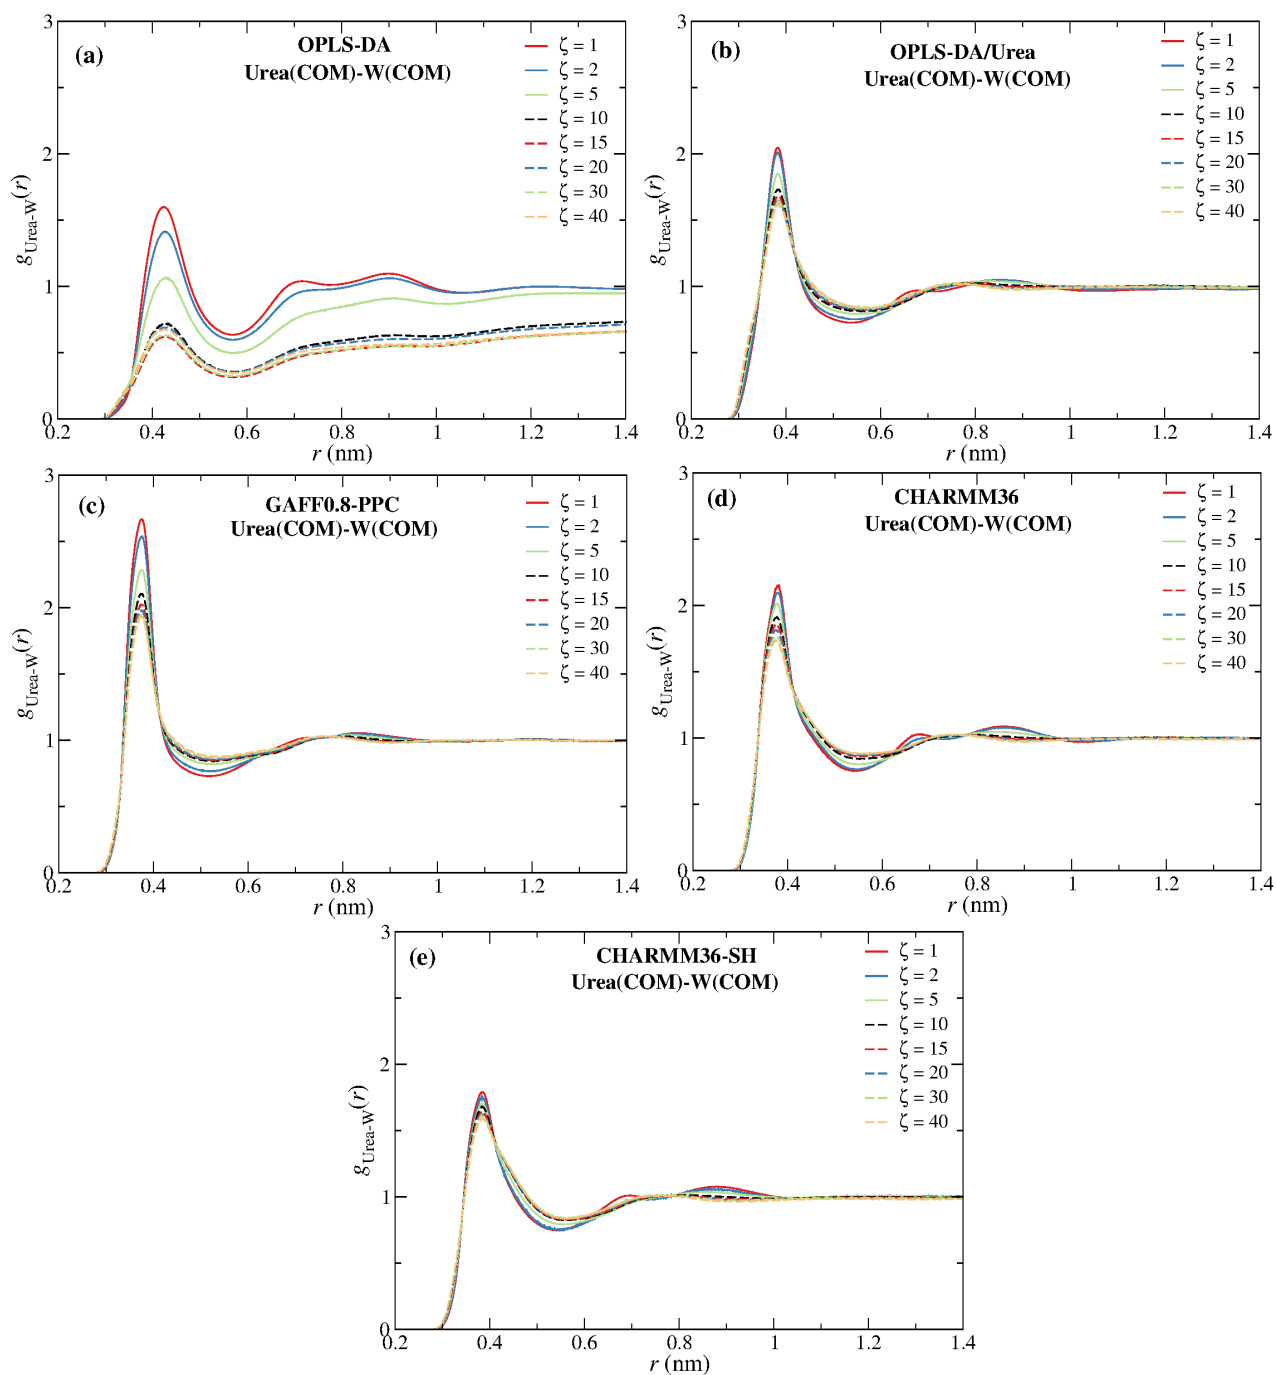

**Figure S11** – Urea-Water rdfs for the different force fields and water contents. The COM of urea and water were used to calculate the rdfs.

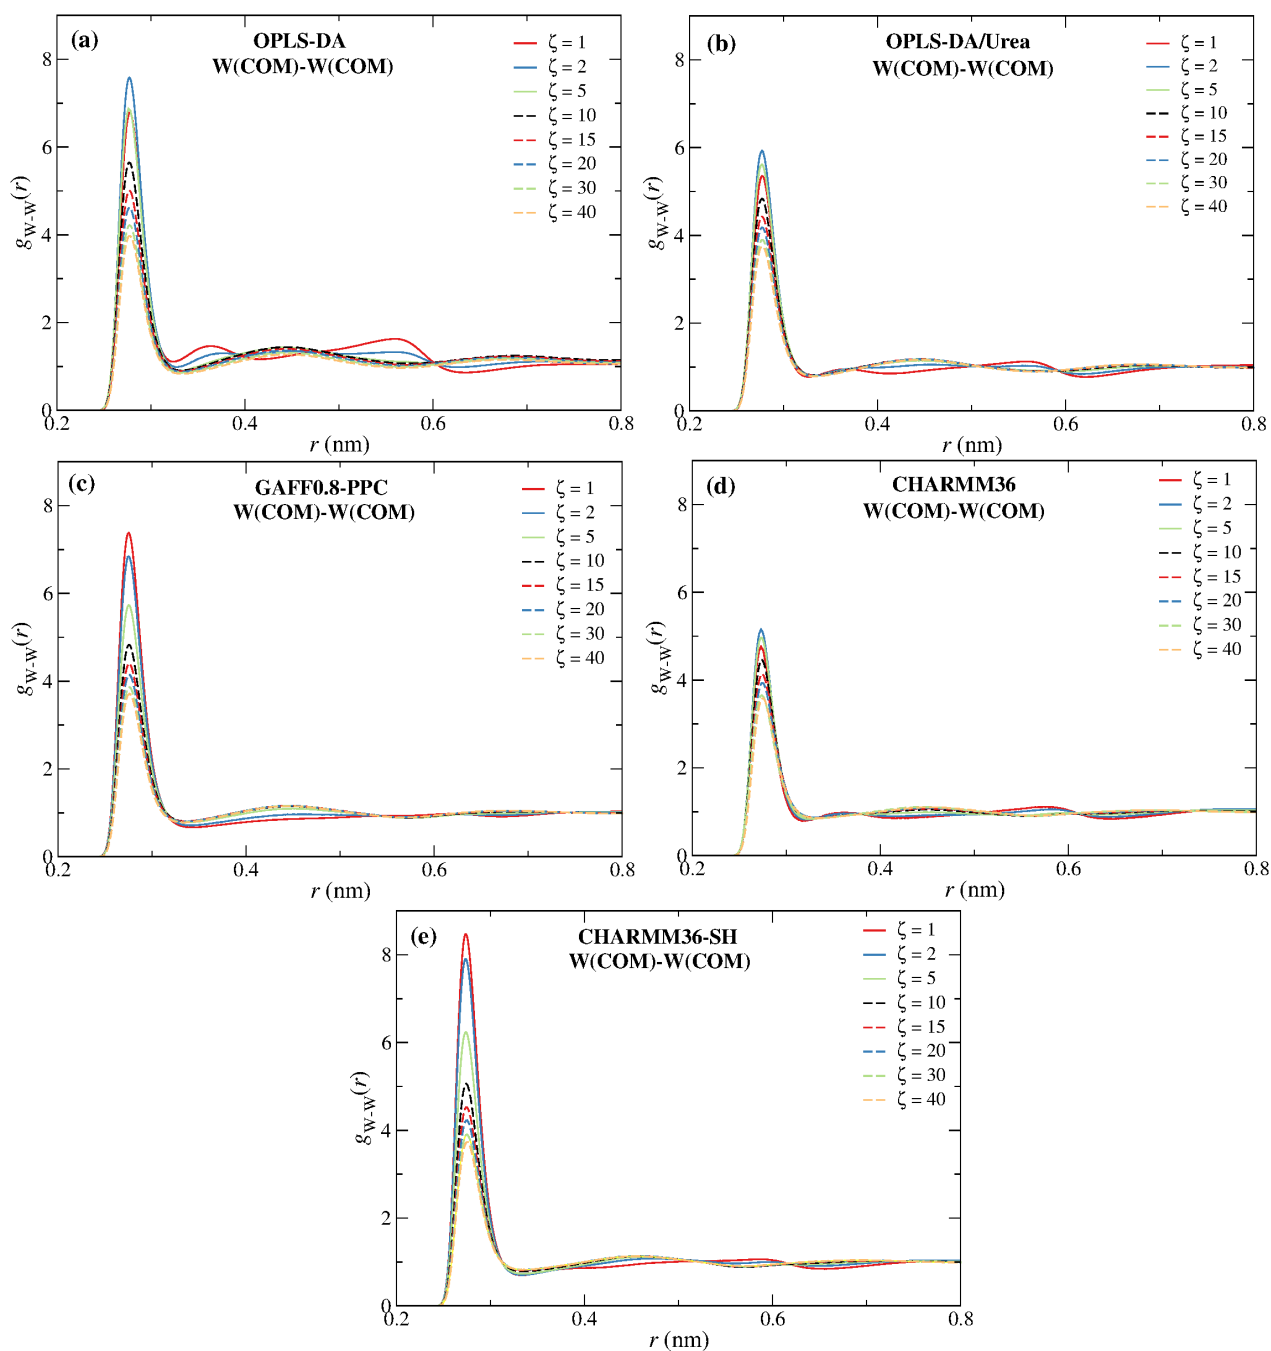

**Figure S12** – Water-Water rdfs for the different force fields and water contents. The COM of water was used to calculate the rdfs. These rdfs are nearly indistinguishable from the oxygen-oxygen (OW-OW) rdfs. Notice the resemblances between the GAFF0.8-PPC and CHARMM36-SH rdfs for which a faster dynamics is observed.

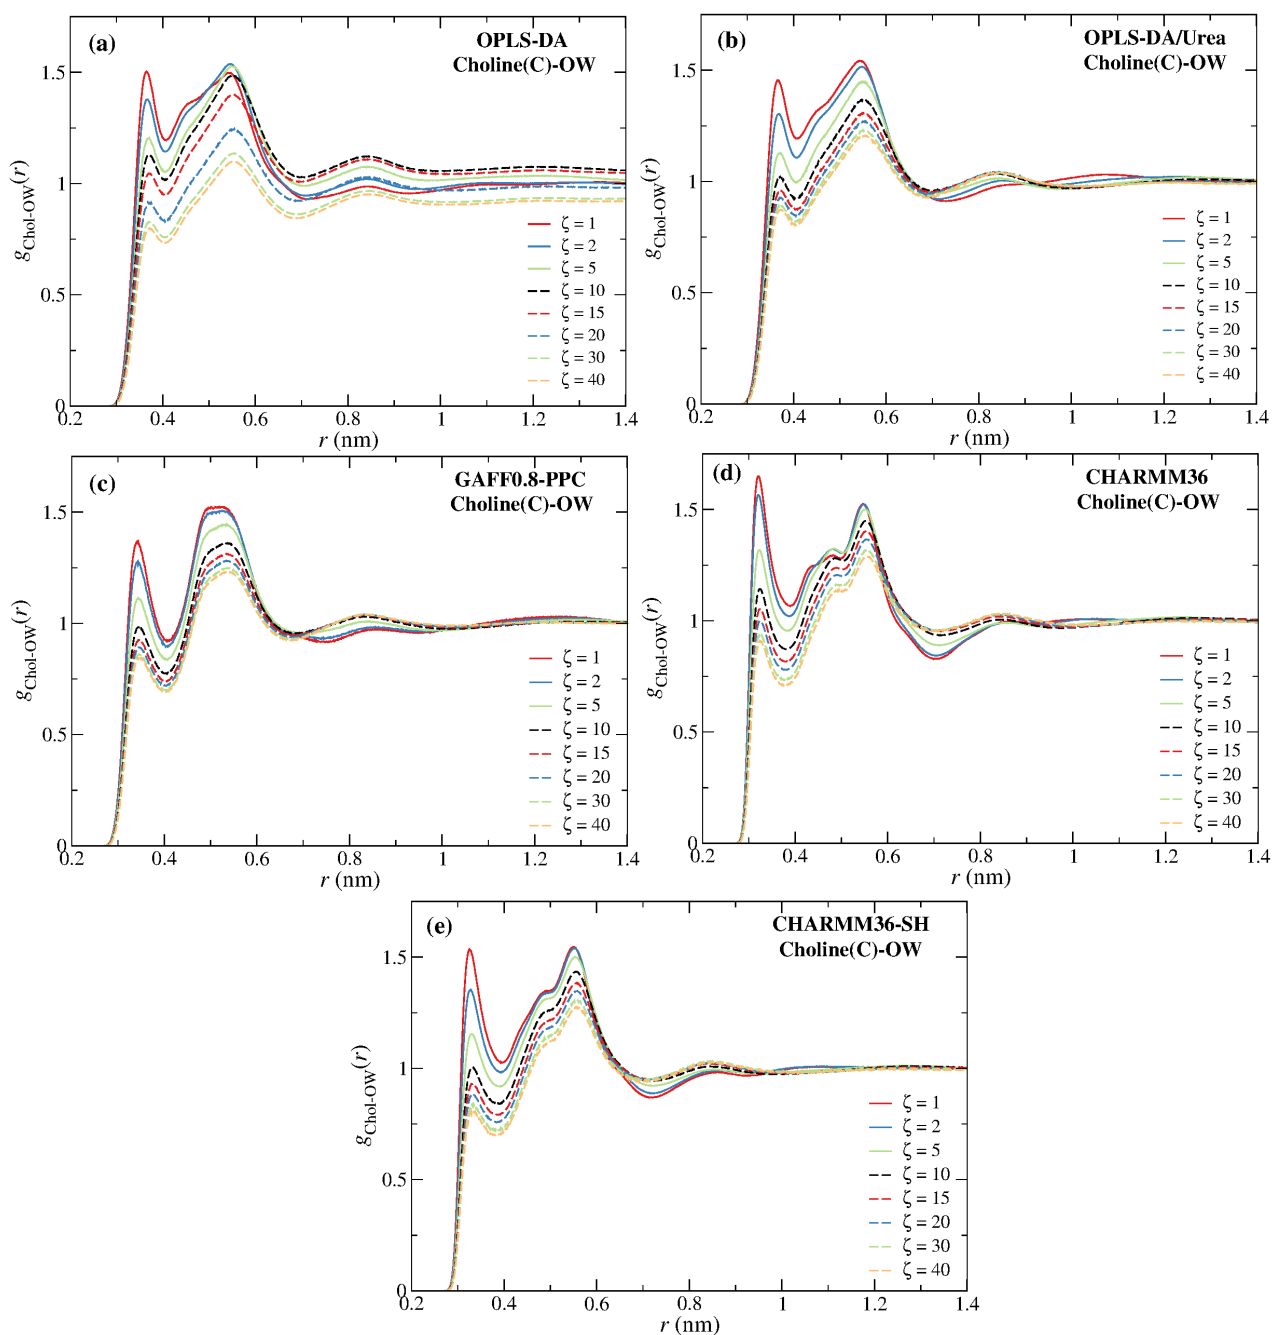

**Figure S13** – Choline-Water rdfs calculated for the C atom of choline (see **Fig. 1**) and the oxygen atom of water. The second minimum was used to calculate the coordination numbers. The coordination numbers corresponding to the first minimum are lower than 3 for every  $\zeta$  exhibiting a monotonic increase with the water content.

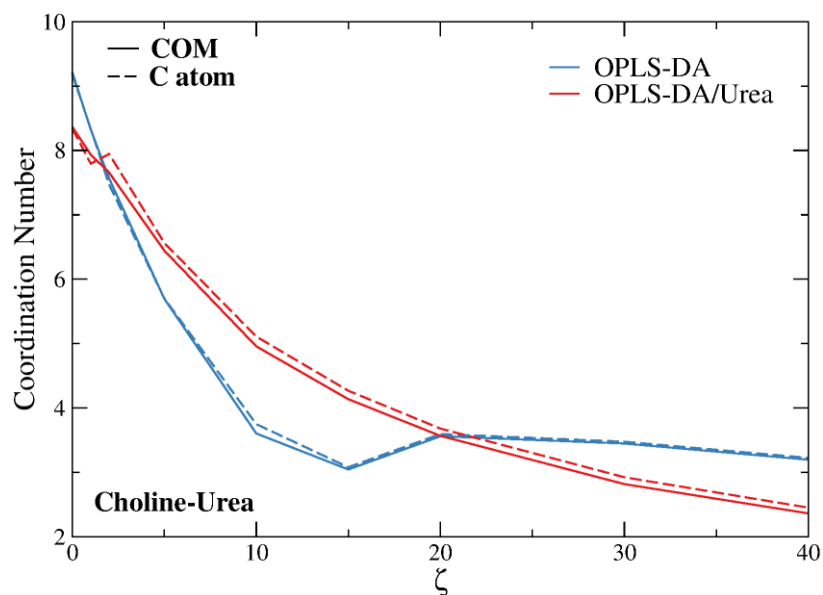

**Figure S14** – Choline-urea coordination number for the OPLS-DA and OPLS-DA/Urea force fields calculated for the COM and the C atom of Fig. 1 of the manuscript. The non-monotonic variation for the OPLS-DA force field is related with the water-induced aggregation of urea.

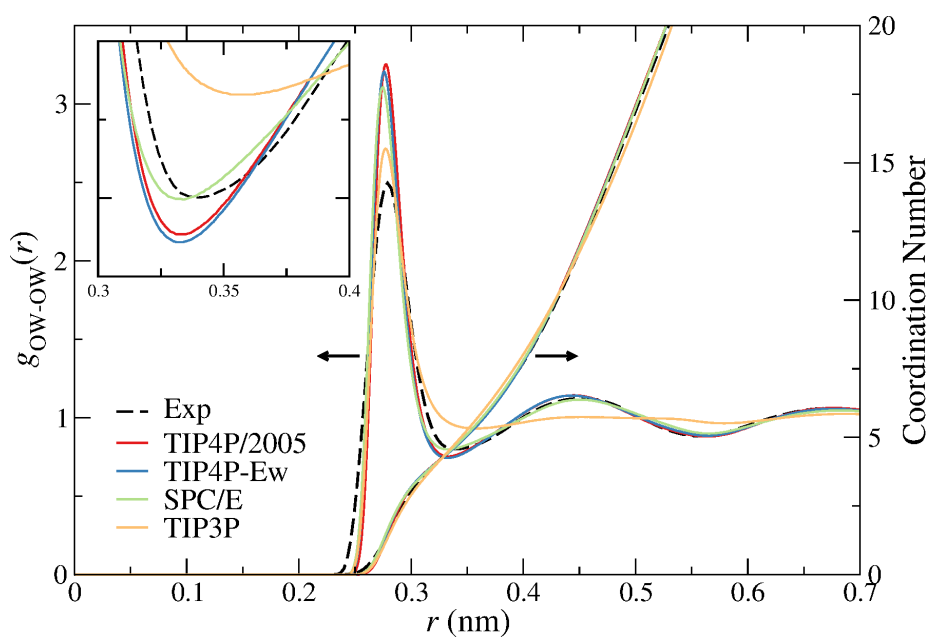

**Figure S15** –Experimental and MD oxygen-oxygen (OW-OW) rdf for pure water for the different water models.
